# Supplementary material for: Adoptive immunotherapy using T lymphocytes redirected to glypican-3 for the treatment of lung squamous cell carcinoma
Source: PubMed Central journal article supplement (PMC4823050; doi:10.18632/oncotarget.6595), 2015-12-14
Supplement: oncotarget-07-2496-s001.pdf [file oncotarget-07-2496-s001.pdf]

## Adoptive immunotherapy using T lymphocytes redirected to glypican-3 for the treatment of lung squamous cell carcinoma

### Supplementary Materials

**Supplementary Table S1: Clinicopathologic features of 60 patients with lung cancer**

| Clinicopathologic features | Number of patients |
|----------------------------|--------------------|
| Age (y)                    |                    |
| > 60                       | 41                 |
| ≤ 60                       | 19                 |
| Gender                     |                    |
| M                          | 42                 |
| F                          | 18                 |
| Pathological type          |                    |
| Adeno                      | 30                 |
| Squamous                   | 30                 |
| Tumor histology            |                    |
| Moderately to poorly       | 20                 |
| Moderately                 | 20                 |
| Poorly                     | 16                 |
| Poorly to moderately       | 2                  |
| Unidentified               | 2                  |
| Clinical stages            |                    |
| I                          | 28                 |
| II                         | 20                 |
| III-IV                     | 12                 |
| Lymphatic metastasis       |                    |
| YES                        | 27                 |
| NO                         | 33                 |

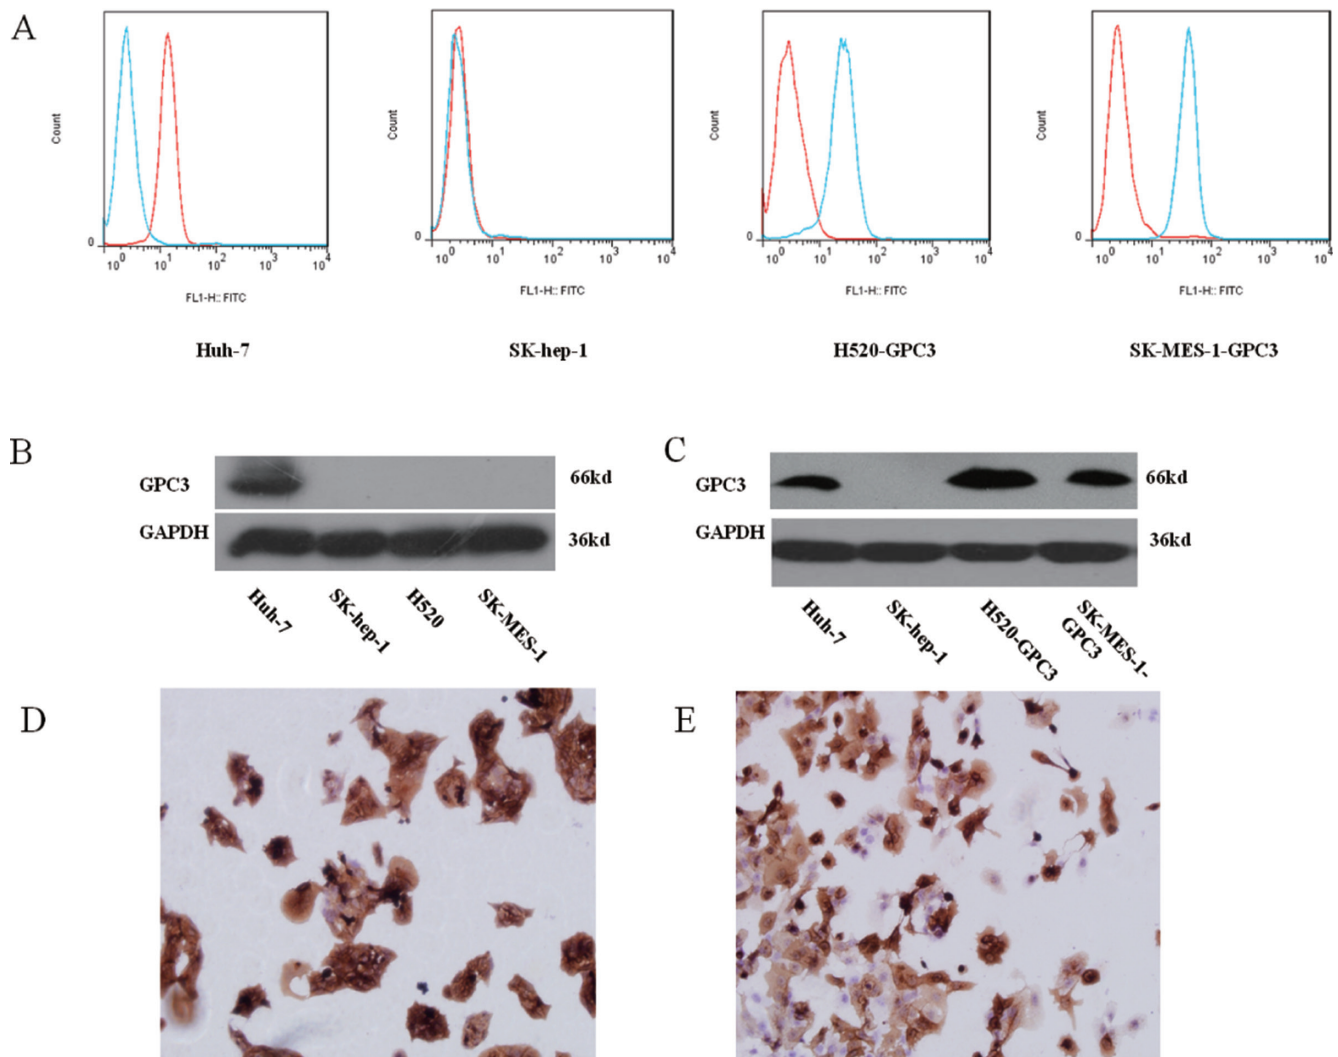

**Supplementary Figure S1: GPC3 expression was analyzed in lung squamous cell carcinoma cell lines. (A), (C)** The expression of GPC3 (red line) on the surface of lung squamous cells as detected by flow cytometry. **(B), (D)** The expression of GPC3 protein in human lung squamous cell lines was detected by Western blot. The human HCC cell lines Huh-7 and SK-hep-1 served as the positive and negative controls, respectively. **(E), (F)** The expression of GPC3 in LSCC cell lines as evaluated by IHC.

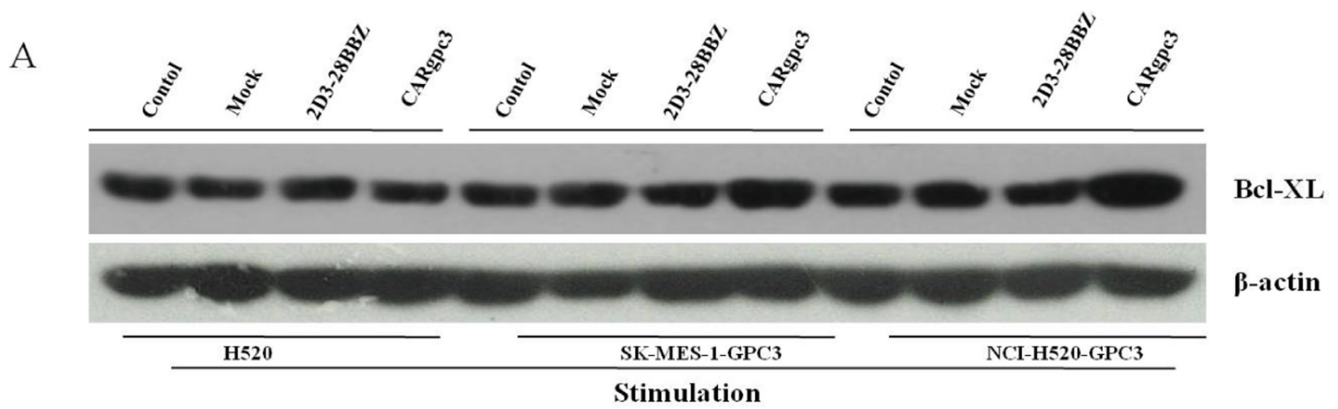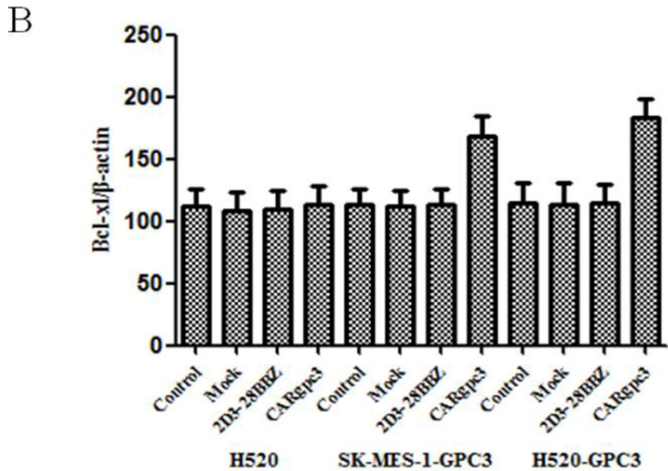

**Supplementary Figure S2: Bcl-xL protein in CAR<sub>gpc3</sub> T cells was up-regulated in GPC3-positive tumor cells.** CAR<sub>gpc3</sub> T cells and the control T cells were each co-cultured with tumor cells (at an effector-to-target ratio of 1:1) for 24 h. The T cells were separated from the tumor cells and subjected to Western blot analysis for the measurement of Bcl-xL protein levels.

**Supplementary Video: The cytotoxicity of CAR<sub>gpc3</sub> T cells against NCI-H520-GPC3 cells in the effector-to-target ratio of 1:1 was also demonstrated by live-cell time-lapse imaging.** The incubation time was 24 hours. Snapshots over time were obtained from live-cell time-lapse images of target cells that underwent apoptotic cell death after they were engaged by the CAR<sub>gpc3</sub> T cells.
